# Supplementary material for: An Artificial CTCF Peptide Triggers Efficient Therapeutic Efficacy in Ocular Melanoma
Source: PubMed Central journal article supplement — Mol Ther Oncolytics. 2020 Jul 9;18:317–25. doi: 10.1016/j.omto.2020.07.004 (PMC7394857; doi:10.1016/j.omto.2020.07.004), 2020-07-09
Supplement: mmc1.pdf [file mmc1.pdf]

**OMTO, Volume 18**

**Supplemental Information**

**An Artificial CTCF Peptide Triggers Efficient**

**Therapeutic Efficacy in Ocular Melanoma**

**Xuyang Wen, Huixue Wang, Peiwei Chai, Jiayan Fan, Xiaoyu Zhang, Tianyi Ding, Renbing Jia, Shengfang Ge, He Zhang, and Xianqun Fan**

**An artificial CTCF peptide triggers efficient therapeutic efficacy in ocular melanoma**

Xuyang Wen, Huixue Wang, Peiwei Chai, Jiayan Fan, Xiaoyu Zhang, Tianyi Ding,  
Renbing Jia, Shengfang Ge, He Zhang, Xianqun Fan

## **Supplementary figure legends**

### **Figure S1 Expression of dsCTCF and deCTCF**

**A-B:** qPCR showed the dsCTCF and deCTCF expressed in both tumor and normal transfected cells.

**C:** Quantitative analysis of western blot verified that the dsCTCF expressed in both tumor and normal transfected cells.

### **Figure S2 Decoy CTCF suppress tumor proliferation**

**A-B:** CCK8 assay demonstrated that deCTCF could significantly reduce the proliferation of transfected ocular melanoma.

**C:** Quantitative analysis of plate clone formation assay verified that dsCTCF or deCTCF could significantly reduce the proliferation of transfected ocular melanoma.

### **Figure S3 Decoy CTCF suppress tumor migration**

**A:** Quantitative analysis of transwell migration assay showed that dsCTCF or deCTCF could significantly reduce the migration ability of ocular melanoma.

**B:** Scratch test suggested that dsCTCF or deCTCF could significantly reduce the migration ability of OCM1.

**C-D:** Quantitative analysis of scratch test also suggested that dsCTCF or deCTCF could significantly reduce the migration ability of ocular melanoma.

### **Figure S4 Decoy CTCF suppress tumorigenesis**

**A-B:** Quantitative analysis of soft agar assay showed fewer colony number in dsCTCF or deCTCF expressed ocular melanoma cells.

### **Figure S5 Decoy CTCF suppress *SELL* expression**

**A:** Searching for genes affected by decoy CTCF. **Left:** RNA-seq screening of upregulated genes in ocular tumor; **Right:** Locating of the wild type CTCF binding site.

**B:** Quantitative analysis of western blot showed that *SELL* was highly expressed in ocular melanoma cells.

**C:** Quantitative analysis of western blot showed the expression of *SELL* was significantly decreased in ocular tumor cells after shRNA interference.

### **Figure S6 *SELL* interference could suppress tumor proliferation and migration**

**A:** Quantitative analysis of plate clone formation assay verified that the proliferation of *SELL*-interfered group was significantly reduced.

**B:** Quantitative analysis of transwell migration assay showed that *SELL* interference could significantly reduce the migration ability of ocular melanoma.

**C-D:** Quantitative analysis of soft agar assay investigated fewer and smaller colonies in *SELL*-interfered groups.

### **Figure S7 STRING protein interaction network of CTCF**

**A:** STRING protein interaction ([www.string-db.org](http://www.string-db.org)) network identified the potential CTCF-binding proteins, such as EZH2 and EP300.

### **Figure S8 The antitumor effect of dsCTCF was not directed by DNA methylation**

**A:** Genome-wide methylation microarrays showed that dsCTCF could only lead to a slight change of methylation levels near its binding sites.

**B:** qPCR showed most of the methylation alteration could only affect gene expression

slightly and not consistent between cell types.

A

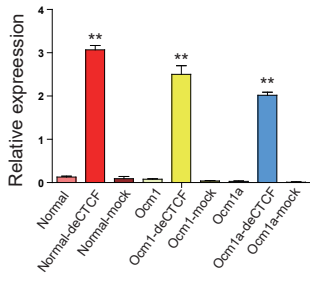

B

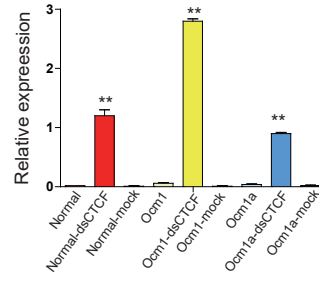

C

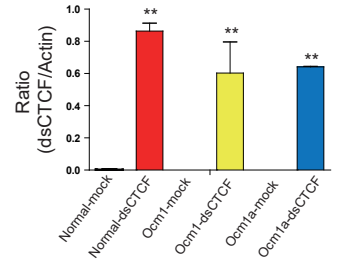

Figure S1

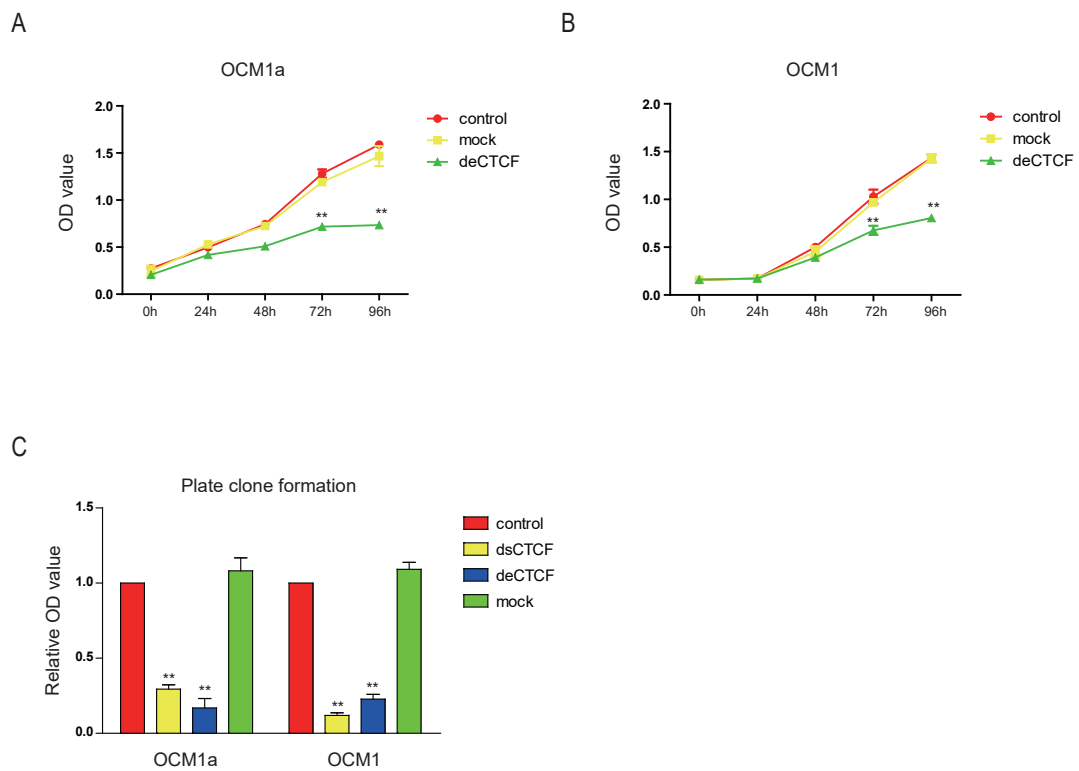

Figure S2

A

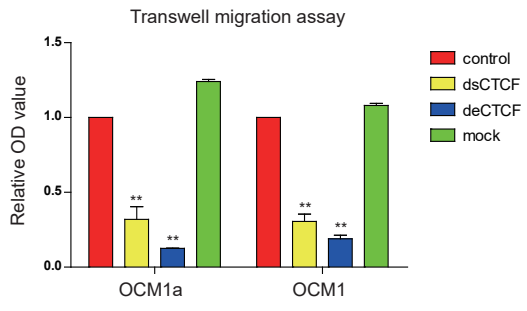

B

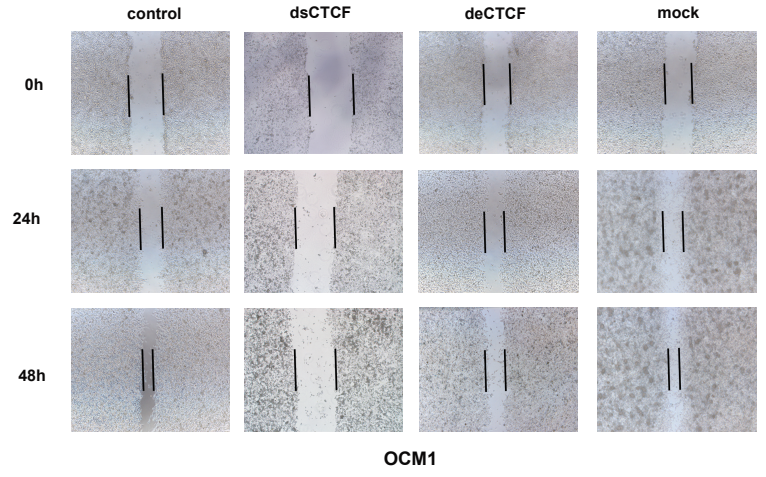

C

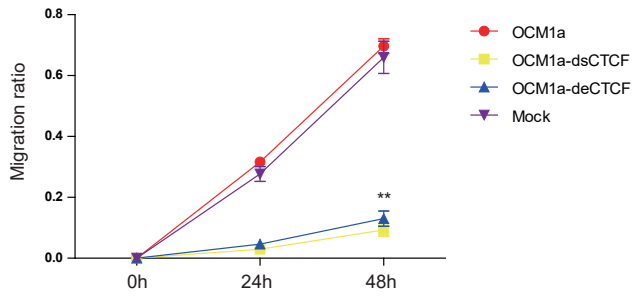

D

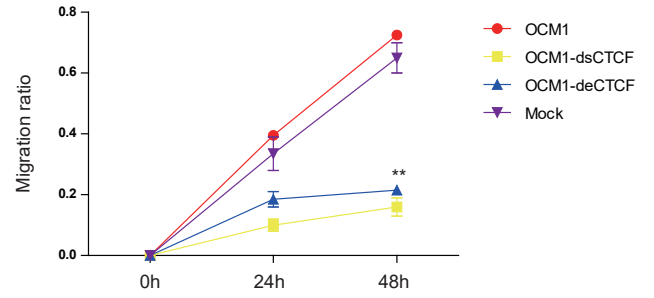

Figure S3



A

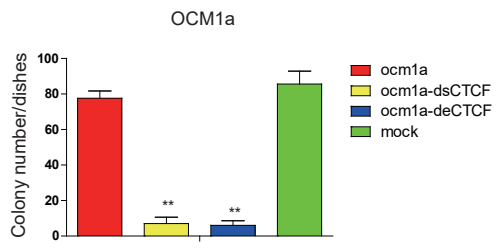

B

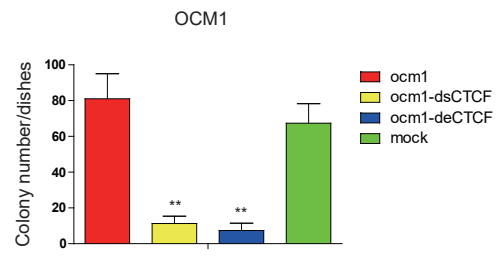

Figure S4

A

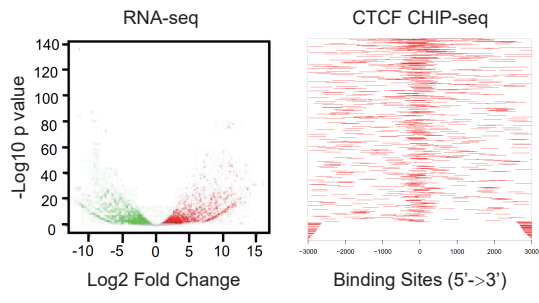

B

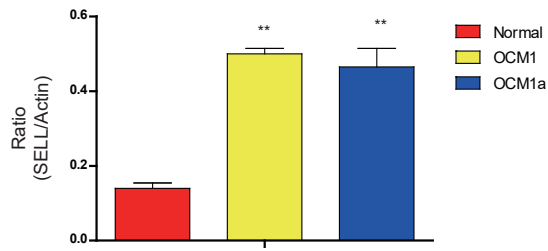

C

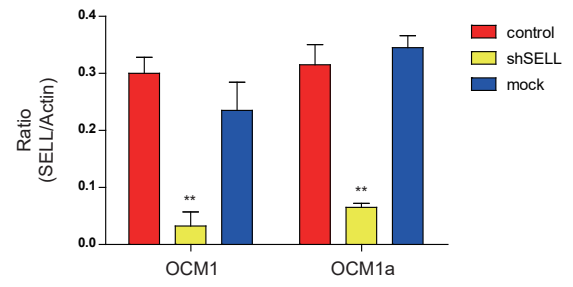

Figure S5

A

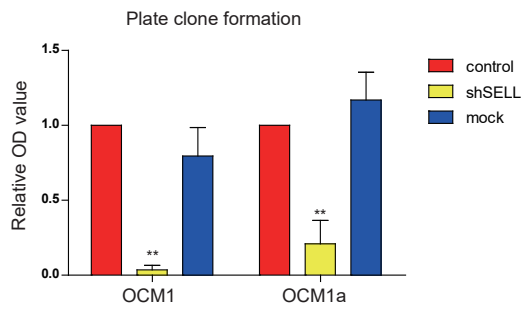

B

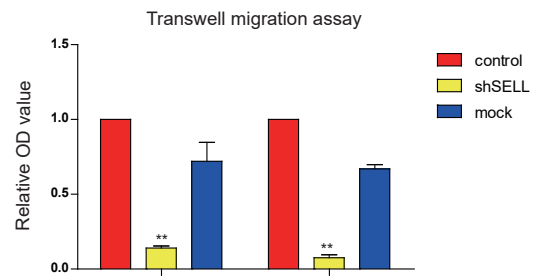

C

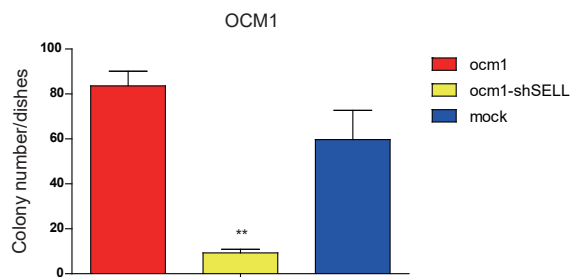

D

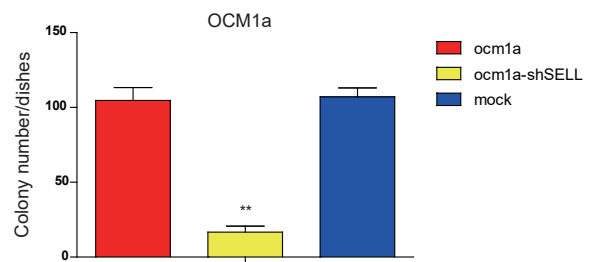

Figure S6

A

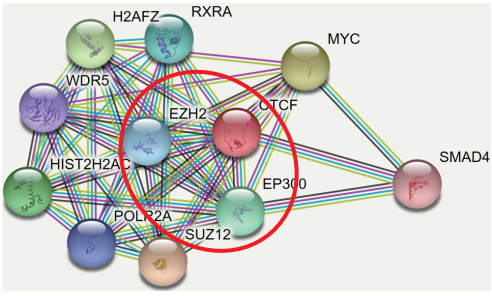

Figure S7

A

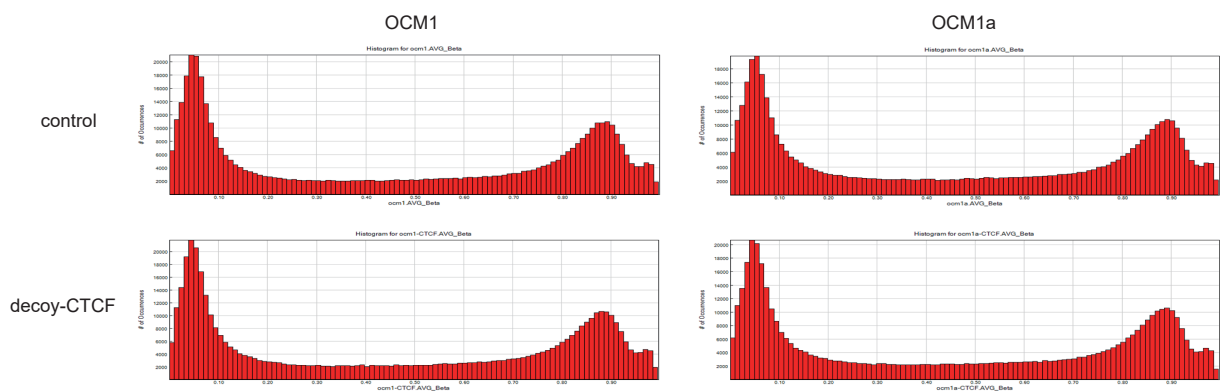

B

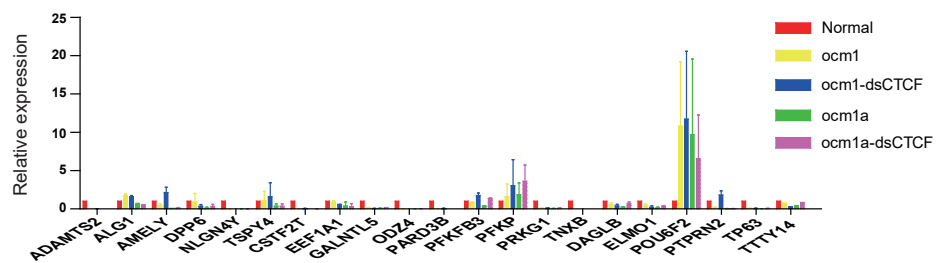

Figure S8
